# Supplementary material for: The Cyclical and Evolving Nature of Methamphetamine Use: An Evaluation of Near Real-time Urine Drug Test Results
Source: PubMed Central journal article supplement — J Addict Med. 2020 Dec 8;15(5):396–405. doi: 10.1097/ADM.0000000000000778 (PMC8489833; doi:10.1097/adm.0000000000000778), 2020-12-08

# Heroin

### East North Central

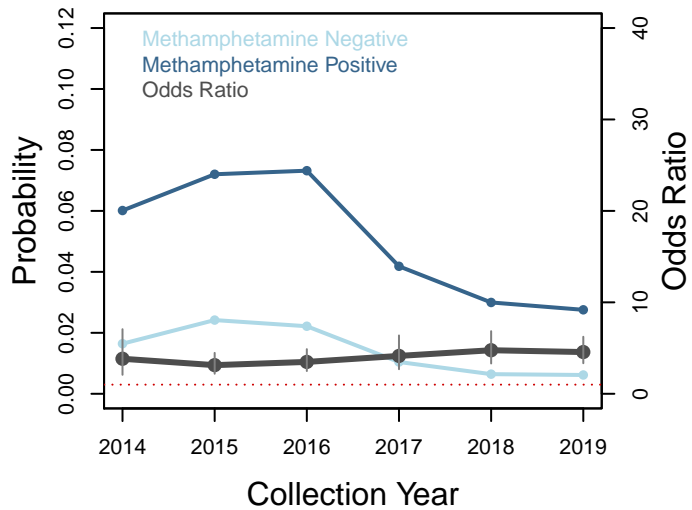

### East South Central

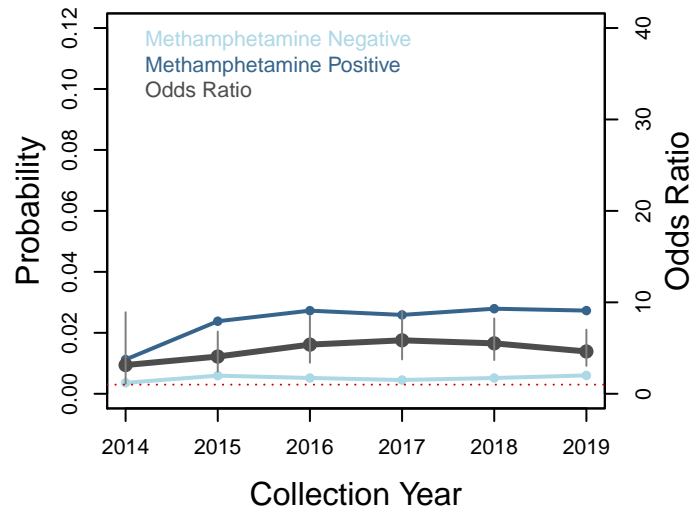

### Mid Atlantic

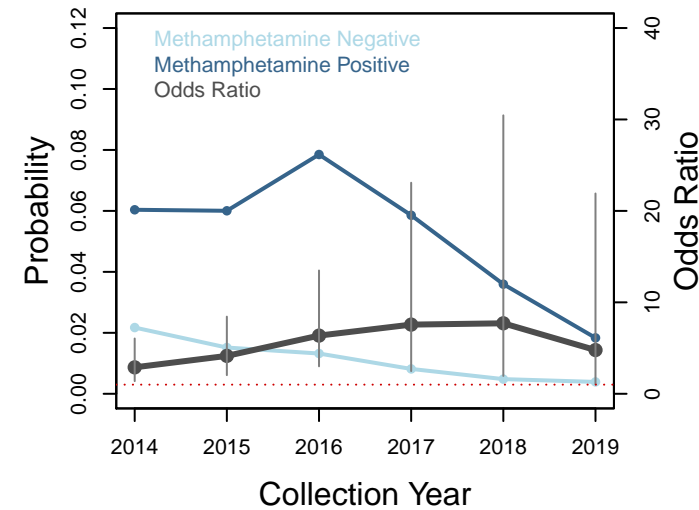

### Mountain

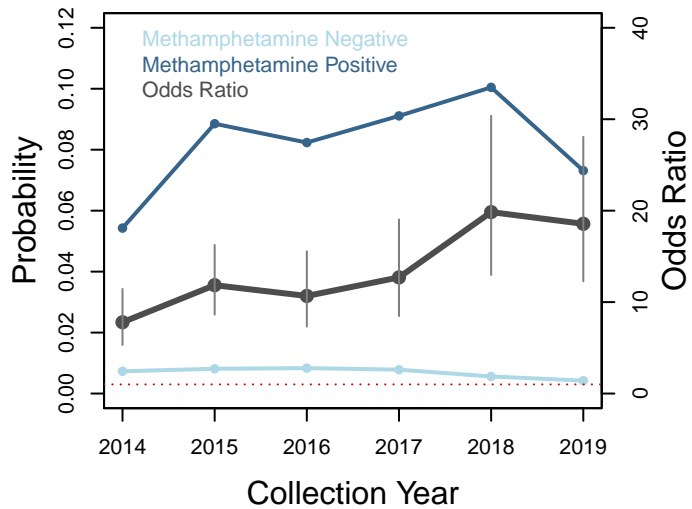

### New England

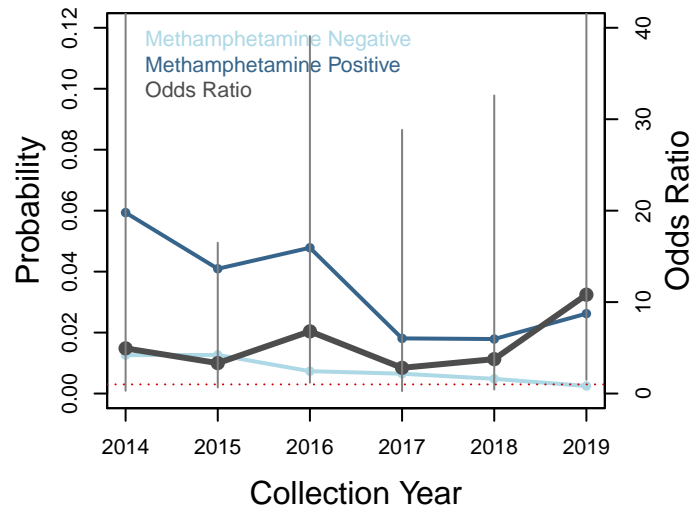

### Pacific

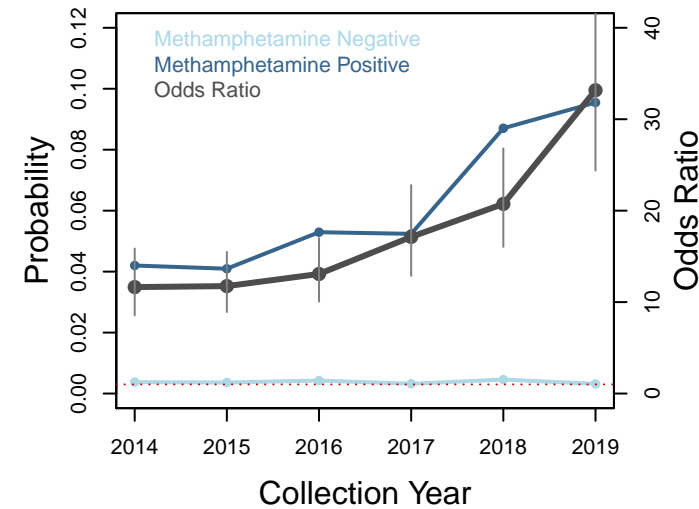

### South Atlantic

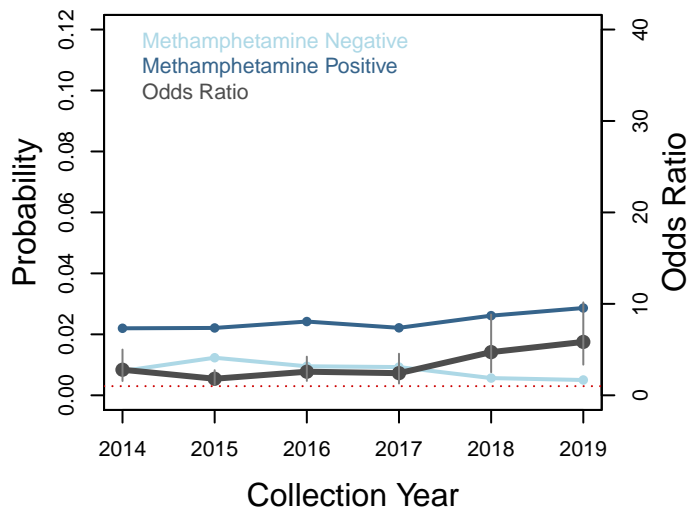

### West North Central

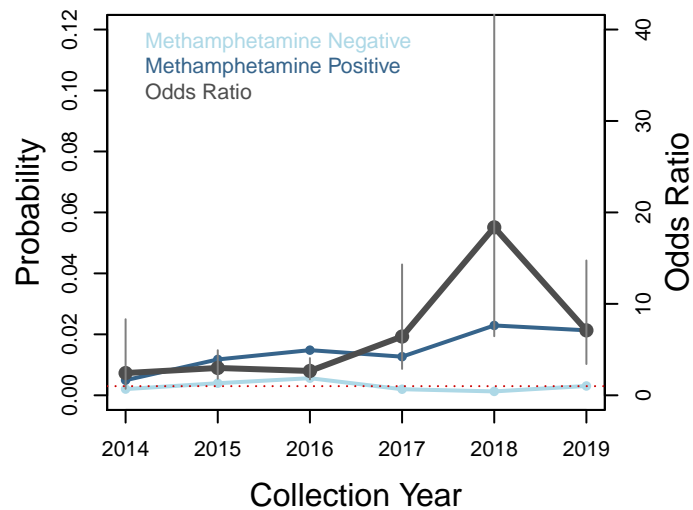

### West South Central

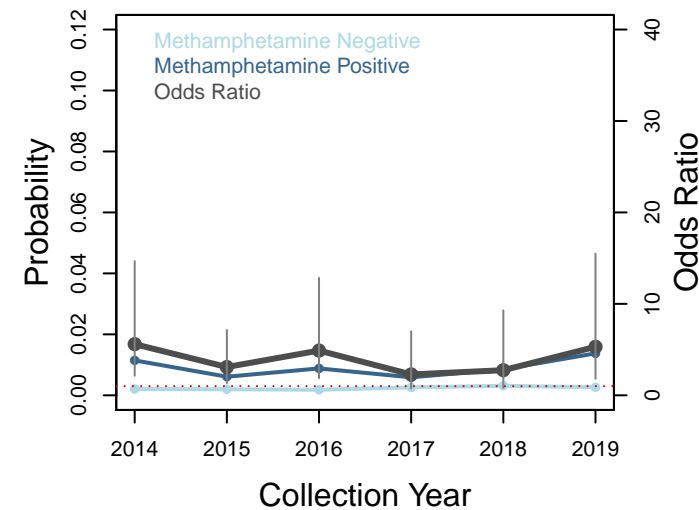

Supplement: adm-15-396-s003.pdf [file adm-15-396-s003.pdf]
